# Supplementary material for: Wheat (Triticum aestivum L.) TaHMW1D Transcript Variants Are Highly Expressed in Response to Heat Stress and in Grains Located in Distal Part of the Spike
Source: MDPI journal article supplement (doi:10.3390/plants10040687), 2021-04-02
Supplement: s1 [file s1]

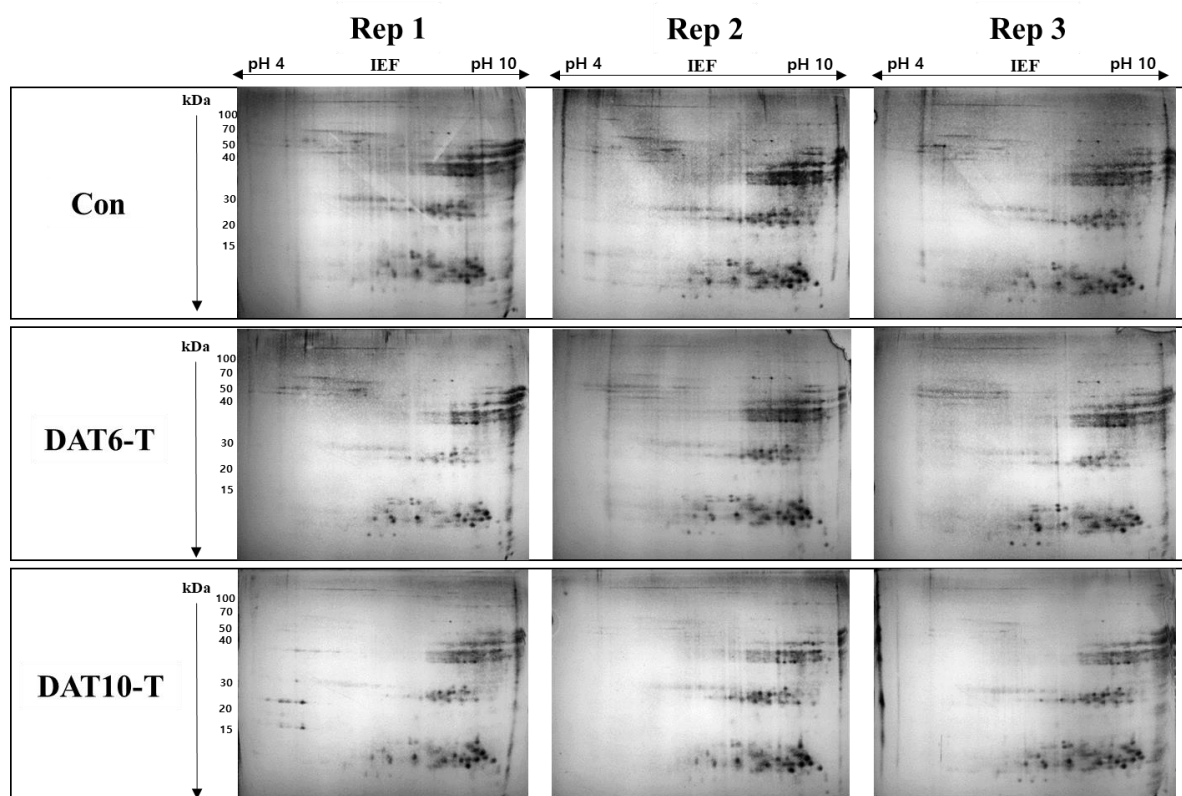

**Figure S1.** 2DE profiles of total seed storage proteins. PI ranges are displayed at the top. Protein sizes are displayed to the left. Con, non-treated control; DAT6-T, 6 days of treatment; DAT10-T, 10 days of treatment. Three biological replicates were used (Rep. 1 – 3).
