# Supplementary material for: Wheat (Triticum aestivum L.) TaHMW1D Transcript Variants Are Highly Expressed in Response to Heat Stress and in Grains Located in Distal Part of the Spike
Source: MDPI journal article supplement (doi:10.3390/plants10040687), 2021-04-02
Supplement: s1 [file s1]

1 **Table S1.** Spots that showed decreased protein levels after high-temperature stress during grain filling

| SSP No.          | Control   | DAT6-T    | DAT10-T  | Protein             |
|------------------|-----------|-----------|----------|---------------------|
| Intensity (log2) |           |           |          |                     |
| 7601             | 9.774687  | 9.676116  | 9.656116 | glutenin            |
| 7602             | 11.89874  | 10.75452  | 10.20216 |                     |
| 8602             | 13.16445  | 12.96445  | 12.43546 |                     |
| 8604             | 11.85698  | 10.98567  | 10.58236 |                     |
| 5806             | 10.00486  | 9.97303   | 9.954172 |                     |
| 6807             | 10.438306 | 10.119806 | 9.747378 |                     |
| 3402             | 11.97937  | 11.97937  | 11.94354 | Alpha-,Beta-gliadin |
| 2403             | 11.751    | 11.65999  | 11.58892 |                     |
| 2402             | 11.14674  | 10.67069  | 10.28957 |                     |
| 6302             | 11.403    | 11.35457  | 10.58631 |                     |
| 5402             | 11.31695  | 11.26874  | 10.94575 |                     |
| 5301             | 11.46622  | 11.32659  | 11.09173 |                     |
| 5202             | 12.16641  | 12.08119  | 11.63084 |                     |
| 3301             | 11.24385  | 11.16644  | 10.88788 |                     |
| 2302             | 11.77691  | 11.56813  | 11.12797 |                     |
| 1301             | 10.16227  | 10.14391  | 9.425538 |                     |
| 2402             | 11.14674  | 10.67069  | 10.28957 |                     |
| 5002             | 13.12194  | 13.11979  | 13.06455 | non-gluten proteins |
| 4202             | 11.64567  | 11.64567  | 11.59977 |                     |
| 3101             | 11.81317  | 11.70669  | 11.70127 |                     |
| 2203             | 12.76997  | 12.66929  | 12.64088 |                     |
| 1101             | 11.32943  | 11.17591  | 11.15075 |                     |
| 1103             | 11.7182   | 11.66809  | 11.56589 |                     |
| 4203             | 9.444297  | 9.444297  | 9.36724  |                     |
| 1002             | 9.057541  | 9.00393   | 8.94825  |                     |
| 6203             | 11.20835  | 11.16966  | 11.06731 |                     |
| 7101             | 12.52412  | 12.42856  | 12.1375  |                     |
| 1                | 8.74461   | 8.58297   | 8.566485 |                     |
| 7201             | 12.73685  | 12.72269  | 12.50416 |                     |
| 7102             | 12.35124  | 12.22713  | 11.43226 |                     |
| 6202             | 11.57788  | 11.54463  | 11.27134 |                     |
| 3202             | 10.19053  | 10.19053  | 9.811016 |                     |
| 2001             | 10.65998  | 10.65998  | 10.50314 |                     |
| 7103             | 8.647746  | 8.597084  | 8.102903 |                     |
| 7101             | 12.52412  | 12.42856  | 12.1375  |                     |
