# Supplementary material for: Wheat (Triticum aestivum L.) TaHMW1D Transcript Variants Are Highly Expressed in Response to Heat Stress and in Grains Located in Distal Part of the Spike
Source: MDPI journal article supplement (doi:10.3390/plants10040687), 2021-04-02
Supplement: s1 [file s1]

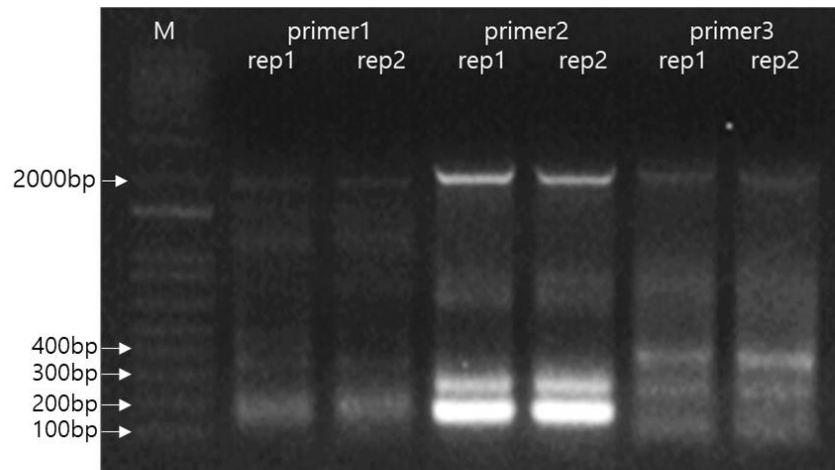

**Figure S3.** Identification of *TaHMW1D* full length using genomic DNA. Agarose gel (1%) showing the 2242 bp *TaHMW1D* gene product.
