# Supplementary figures and images for: Wheat (Triticum aestivum L.) TaHMW1D Transcript Variants Are Highly Expressed in Response to Heat Stress and in Grains Located in Distal Part of the Spike
Source: MDPI journal article supplement (doi:10.3390/plants10040687), 2021-04-02

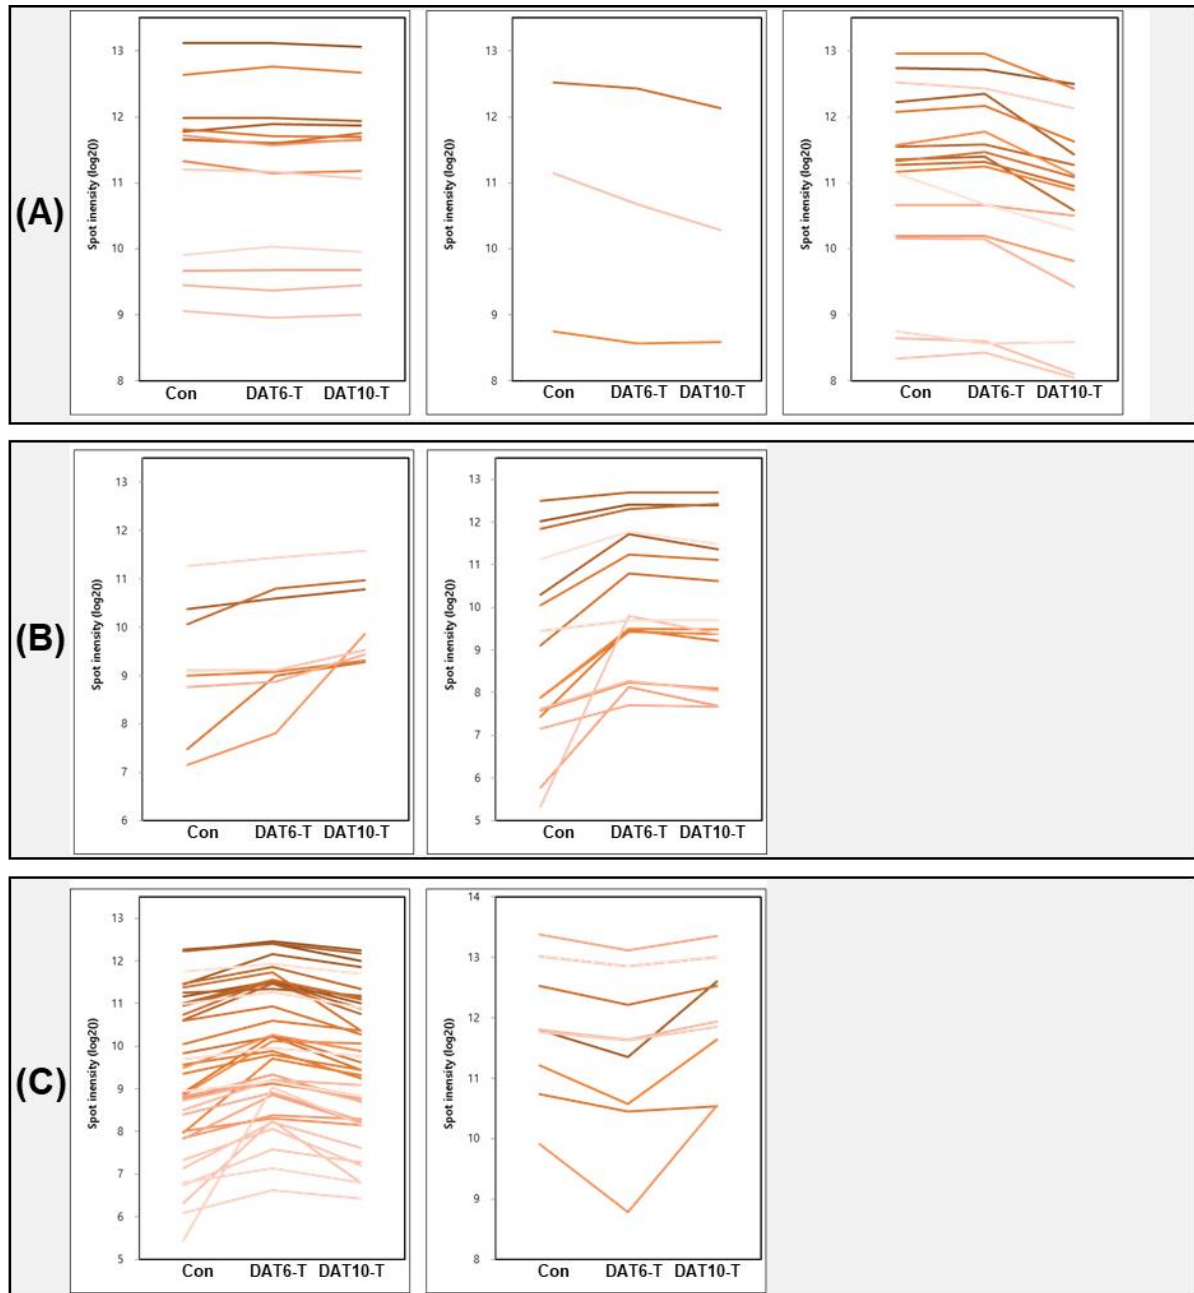

**Figure S2.** 2DE expression patterns

Supplement: s1 [file s1]
